# Supplementary material for: Exploiting the Innate Potential of Sorghum/Sorghum–Sudangrass Cover Crops to Improve Soil Microbial Profile That Can Lead to Suppression of Plant-Parasitic Nematodes
Source: MDPI journal article supplement (doi:10.3390/microorganisms9091831), 2021-08-29
Supplement: s1 [file s1]

Table S1. Initial population of *Meloidogyne* spp. and *Rotylenchulus reniformis* per 250 cm<sup>3</sup> soil.

| <i>Abundance</i> | Treatments              |            |           |            |            |            |            |            |
|------------------|-------------------------|------------|-----------|------------|------------|------------|------------|------------|
|                  | BG                      | 512        | LA        | BK         | BKP        | CV         | NX1        | NX2        |
| Root-knot        | 553 ± 223a <sup>y</sup> | 463 ± 148a | 258 ± 49a | 548 ± 232a | 818 ± 383a | 530 ± 217a | 390 ± 143a | 533 ± 160a |
| Reniform         | 15 ± 3a                 | 10 ± 4a    | 13 ± 3a   | 20 ± 7a    | 30 ± 12a   | 15 ± 3a    | 13 ± 6a    | 20 ± 14a   |

<sup>y</sup>Means ± standard error ( $n = 4$ ) followed by the same letter(s) in a row are not different based on Waller-Duncan  $k$ -ratio ( $k = 100$ )  $t$ -test.
